# Supplementary material for: Recombinant Human Prolidase (rhPEPD) Induces Wound Healing in Experimental Model of Inflammation through Activation of EGFR Signalling in Fibroblasts
Source: MDPI journal article supplement (doi:10.3390/molecules28020851), 2023-01-14
Supplement: s1 [file s1]

# Recombinant Human Prolidase (rhPEPD) Induces Wound Healing in Experimental Model of Inflammation Through Activation of EGFR Signalling in Fibroblasts

Weronika Baszanowska <sup>1</sup>, Magdalena Nizioł <sup>2</sup>, Ilona Oscilowska <sup>1</sup>, Justyna Czyrko-Horczak<sup>3</sup>, Wojciech Milyk <sup>2</sup> and Jerzy Palka <sup>1,\*</sup>

<sup>1</sup> Department of Medicinal Chemistry, Medical University of Białystok, Kilinskiego 1, 15-089 Białystok, Poland, phone: +48-85-748-5706; e-mail: w.baszanowska22@wp.pl (W.B.), ilona.zareba@gmail.com (I.O.), pal@umb.edu.pl (J.P.)

<sup>2</sup> Department of Analysis and Bioanalysis of Medicines, Medical University of Białystok, Kilinskiego 1, 15-089 Białystok, Poland, phone: +48-85-748-5845; e-mail: magdalena.misiura@umb.edu.pl (M.M.); wojciech.milyk@umb.edu.pl (W.M.)

<sup>3</sup> Department of Structural Chemistry, Faculty of Chemistry, University of Białystok, Ciołkowskiego 1K, Białystok, 15-245 Poland, phone: 85-738-8062; e-mail: [czyrko.justyna@gmail.com](mailto:czyrko.justyna@gmail.com) (J.C.H.)

\* Correspondence: pal@umb.edu.pl; Tel.: +48-85-748-5706

**Description of data:** The blots and images are described in the result section.

Supplementary data analysis presented- representative blots from Western blotting on Figures 3A,B and 4A,B.

## 1. Representative blots from Western blotting analysis presented in Figure 3A.

### 1.1. EGFR expression

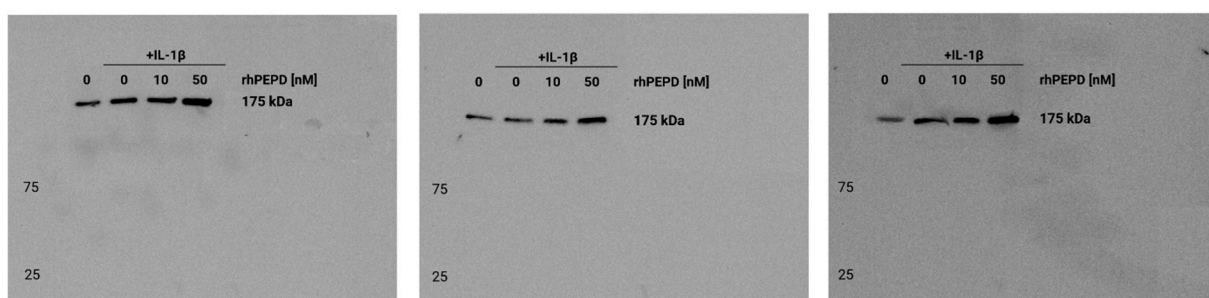

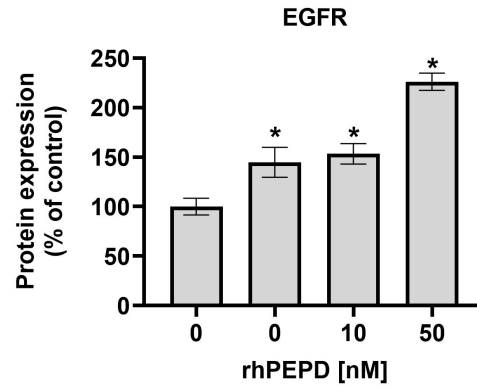

**Figure S1.** The EGFR expressions in rhPEPD-treated fibroblasts (rhPEPD, 10, 50 nM) for 24 h in presence or absence of IL-1 $\beta$  (10ng/ml). GAPDH expression was used as a loading control. The WB bands intensity of representative gels was quantified by densitometry and normalized to GAPDH. The densitometry values represent the mean (% of control)  $\pm$  SD of three experiments. Statistical significances were expressed as \* $P$  < 0.05; vs. control cells (0 nM of PEPD, without IL-1 $\beta$ ).

## 1.2. Phospho-EGFR expression

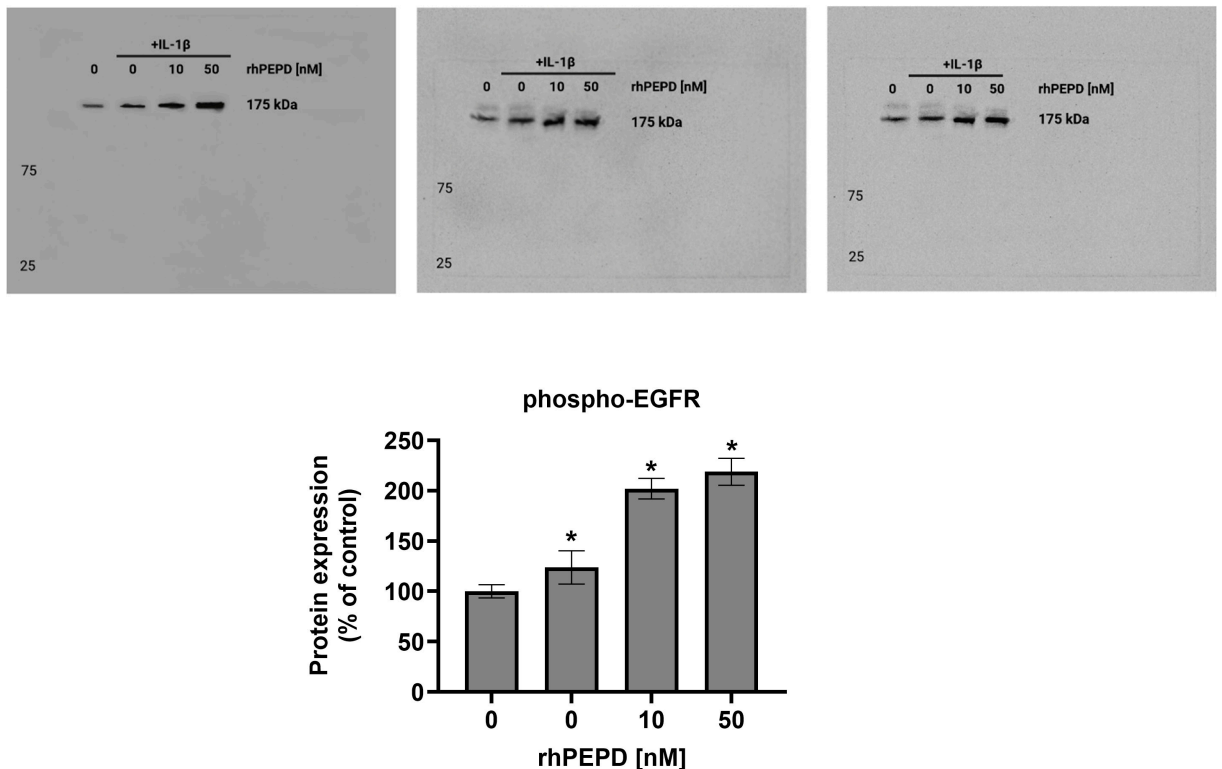

**Figure S2.** The phospho-EGFR expressions in rhPEPD-treated fibroblasts (rhPEPD, 10, 50 nM) for 40 min in presence or absence of IL-1 $\beta$  (10ng/ml). GAPDH expression was used as a loading control. The WB bands intensity of representative gels was quantified by densitometry and normalized to GAPDH. The densitometry values represent the mean (% of control)  $\pm$  SD of three experiments. Statistical significances were expressed as \* $P$  < 0.05; vs. control cells (0 nM of PEPD, without IL-1 $\beta$ ).

### 1.3. PI3K expression

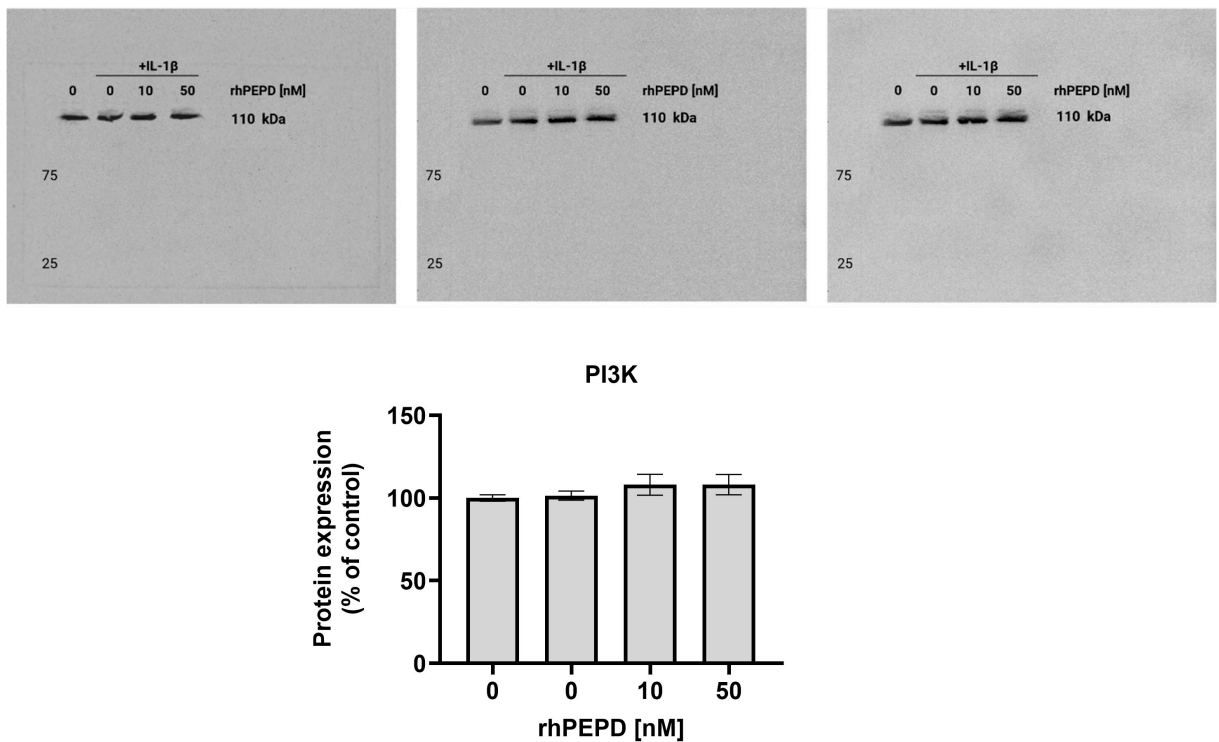

**Figure S3.** The PI3K expressions in rhPEPD-treated fibroblasts (rhPEPD, 10, 50 nM) for 24 h in presence or absence of IL-1 $\beta$  (10ng/ml). GAPDH expression was used as a loading control. The WB bands intensity of representative gels was quantified by densitometry and normalized to GAPDH. The densitometry values represent the mean (% of control)  $\pm$  SD of three experiments. Statistical significances were expressed as  $*P < 0.05$ ; vs. control cells (0 nM of PEPD, without IL-1 $\beta$ ).

### 1.4. Phospho-PI3K expression

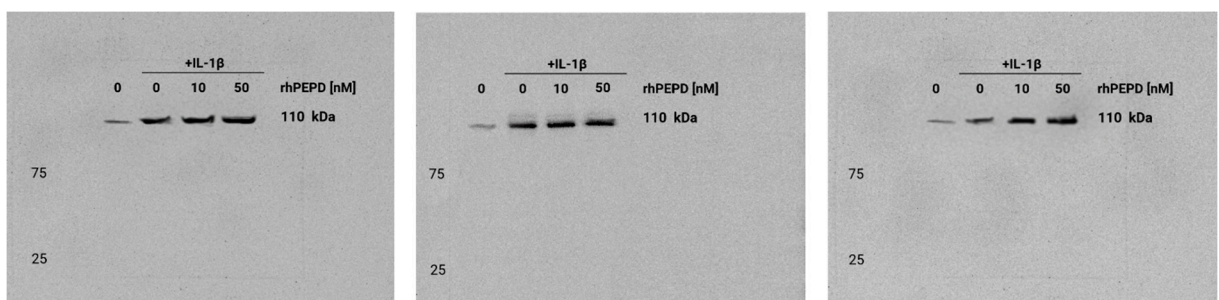

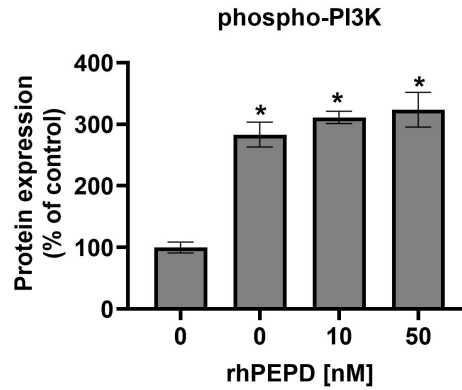

**Figure S4.** The phospho-PI3K expressions in rhPEPD-treated fibroblasts (rhPEPD, 10, 50 nM) for 40 min in presence or absence of IL-1 $\beta$  (10ng/ml). GAPDH expression was used as a loading control. The WB bands intensity of representative gels was quantified by densitometry and normalized to GAPDH. The densitometry values represent the mean (% of control)  $\pm$  SD of three experiments. Statistical significances were expressed as \* $P$  < 0.05; vs. control cells (0 nM of PEPD, without IL-1 $\beta$ ).

### 1.5. AKT expression

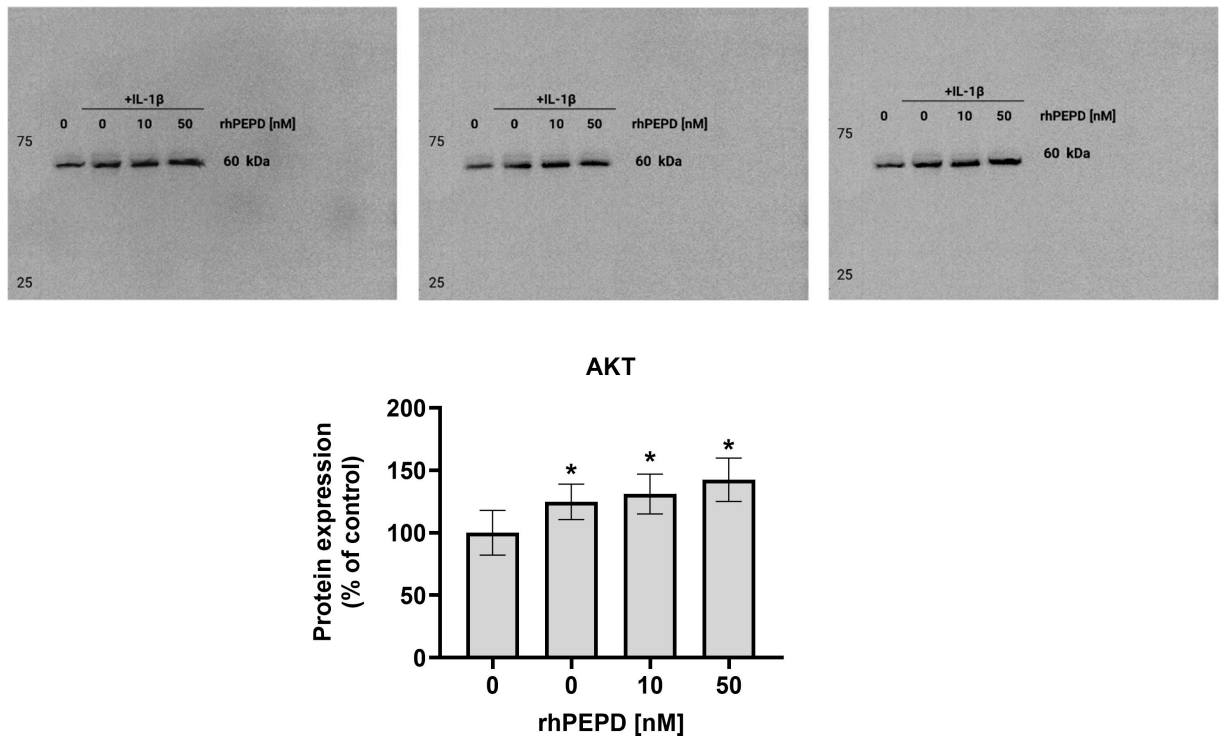

**Figure S5.** The AKT expressions in rhPEPD-treated fibroblasts (rhPEPD, 10, 50 nM) for 24 h in presence or absence of IL-1 $\beta$  (10ng/ml). GAPDH expression was used as a loading control. The WB bands intensity of representative gels was quantified by densitometry and normalized to GAPDH. The densitometry values represent the mean (% of control)  $\pm$  SD of three experiments. Statistical significances were expressed as \* $P$  < 0.05; vs. control cells (0 nM of PEPD, without IL-1 $\beta$ ).

## 1.6. Phospho-AKT expression

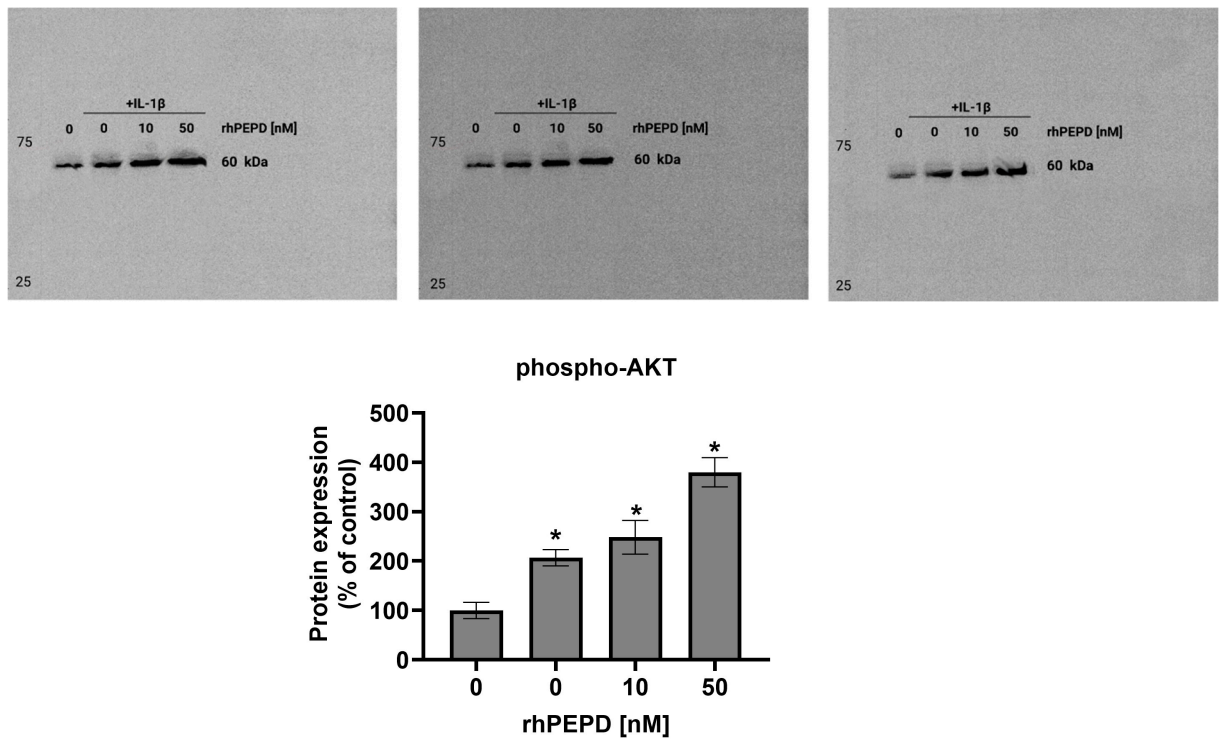

**Figure S6.** The phospho-AKT expressions in rhPEPD-treated fibroblasts (rhPEPD, 10, 50 nM) for 40 min in presence or absence of IL-1 $\beta$  (10ng/ml). GAPDH expression was used as a loading control. The WB bands intensity of representative gels was quantified by densitometry and normalized to GAPDH. The densitometry values represent the mean (% of control)  $\pm$  SD of three experiments. Statistical significances were expressed as \* $P$  < 0.05; vs. control cells (0 nM of PEPD, without IL-1 $\beta$ ).

## 1.7. mTOR expression

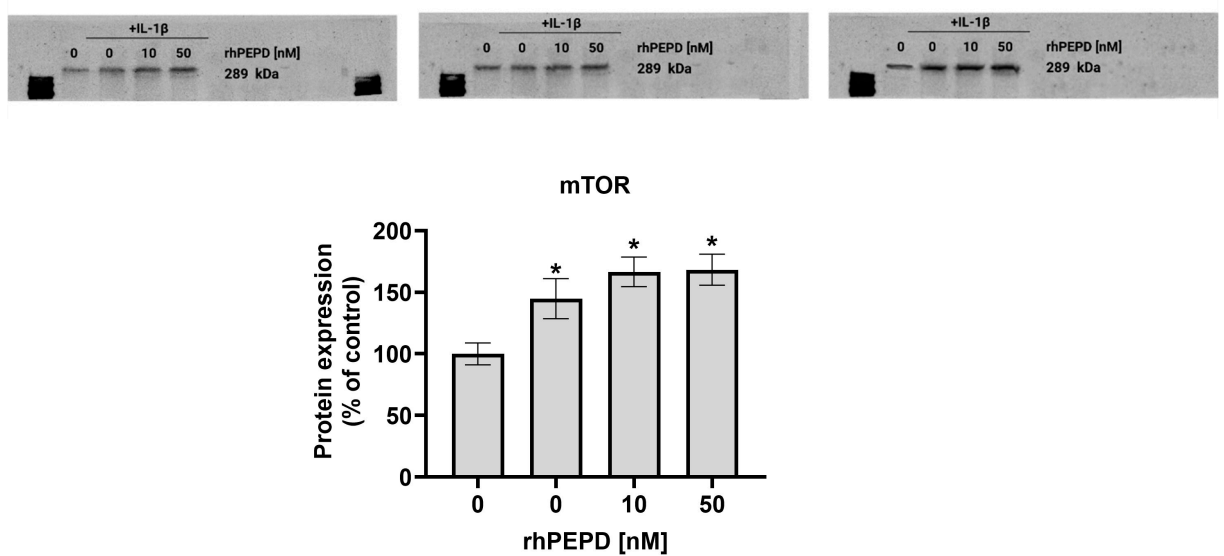

**Figure S7.** The mTOR expressions in rhPEPD-treated fibroblasts (rhPEPD, 10, 50 nM) for 24 h in presence or absence of IL-1 $\beta$  (10ng/ml). GAPDH expression was used as a loading control. The WB bands intensity of representative gels was quantified by densitometry and normalized to GAPDH. The densitometry values represent the mean (% of control)  $\pm$  SD of three experiments. Statistical significances were expressed as \* $P$  < 0.05; vs. control cells (0 nM of PEPD, without IL-1 $\beta$ ).

### 1.8. Phospho-mTOR expression

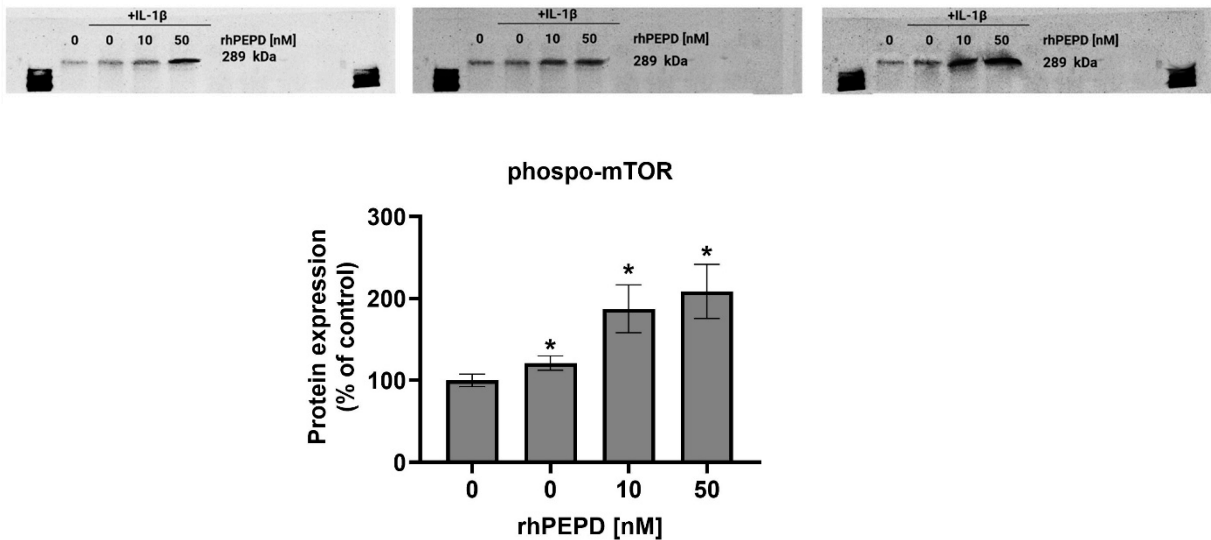

**Figure S8.** The phospho-mTOR expressions in rhPEPD-treated fibroblasts (rhPEPD, 10, 50 nM) for 40 min in presence or absence of IL-1 $\beta$  (10ng/ml). GAPDH expression was used as a loading control. The WB bands intensity of representative gels was quantified by densitometry and normalized to GAPDH. The densitometry values represent the mean (% of control)  $\pm$  SD of three experiments. Statistical significances were expressed as \* $P$  < 0.05; vs. control cells (0 nM of PEPD, without IL-1 $\beta$ ).

### 1.9. GAPDH expression

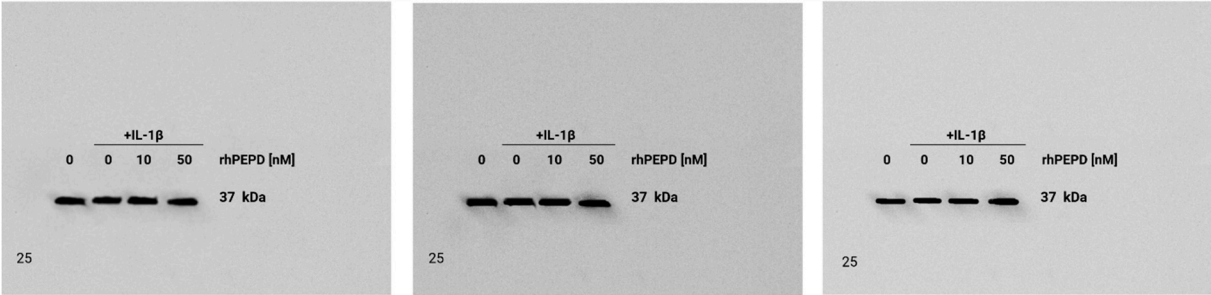



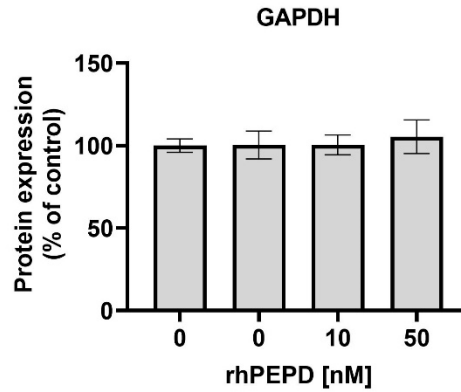

**Figure S9.** The GAPDH expressions in rhPEPD-treated fibroblasts (rhPEPD, 10, 50 nM) 24 h in presence or absence of IL-1 $\beta$  (10ng/ml). GAPDH expression was used as a loading control. The WB bands intensity of representative gels was quantified by densitometry and normalized to GAPDH. The densitometry values represent the mean (% of control)  $\pm$  SD of three experiments. Statistical significances were expressed as  $*P < 0.05$ ; vs. control cells (0 nM of PEPD, without IL-1 $\beta$ ).

## 2. Representative blots from Western blotting analysis presented in Figure 3B.

### 2.1. EGFR expression

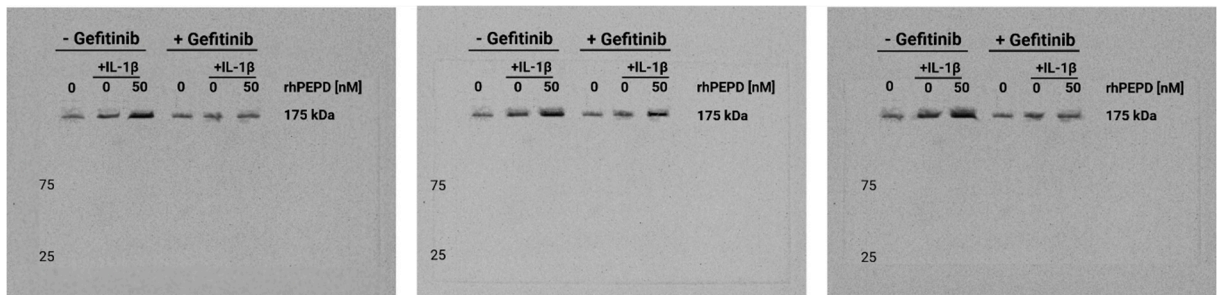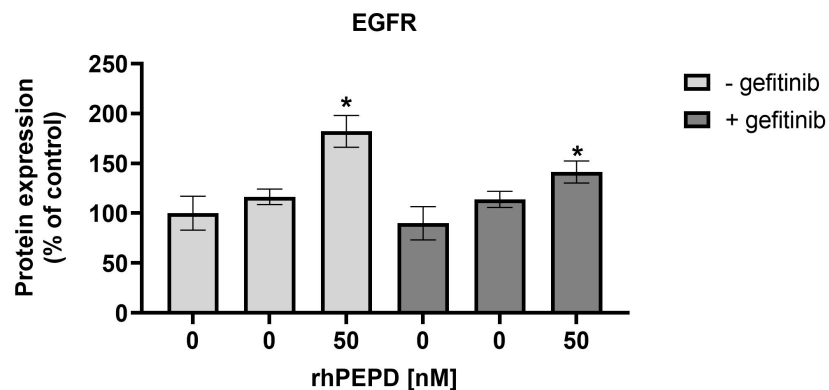

**Figure S10.** The EGFR expressions in lysates of rhPEPD-treated fibroblasts (rhPEPD, 50 nM) and pretreated with an inhibitor of EGFR (gefitinib, 45  $\mu$ M for 2 h) cultured for 24 h in presence or absence IL-1 $\beta$ . (10ng/ml). GAPDH expression was used as a loading control. The WB bands intensity of representative gels was quantified by densitometry and normalized to GAPDH. The

densitometry values represent the mean (% of control)  $\pm$  SD of three experiments. Statistical significances were expressed as  $*P < 0.05$ ; vs. control cells (0 nM of PEPD, without IL-1 $\beta$ ).

## 2.2. Phospho-EGFR expression

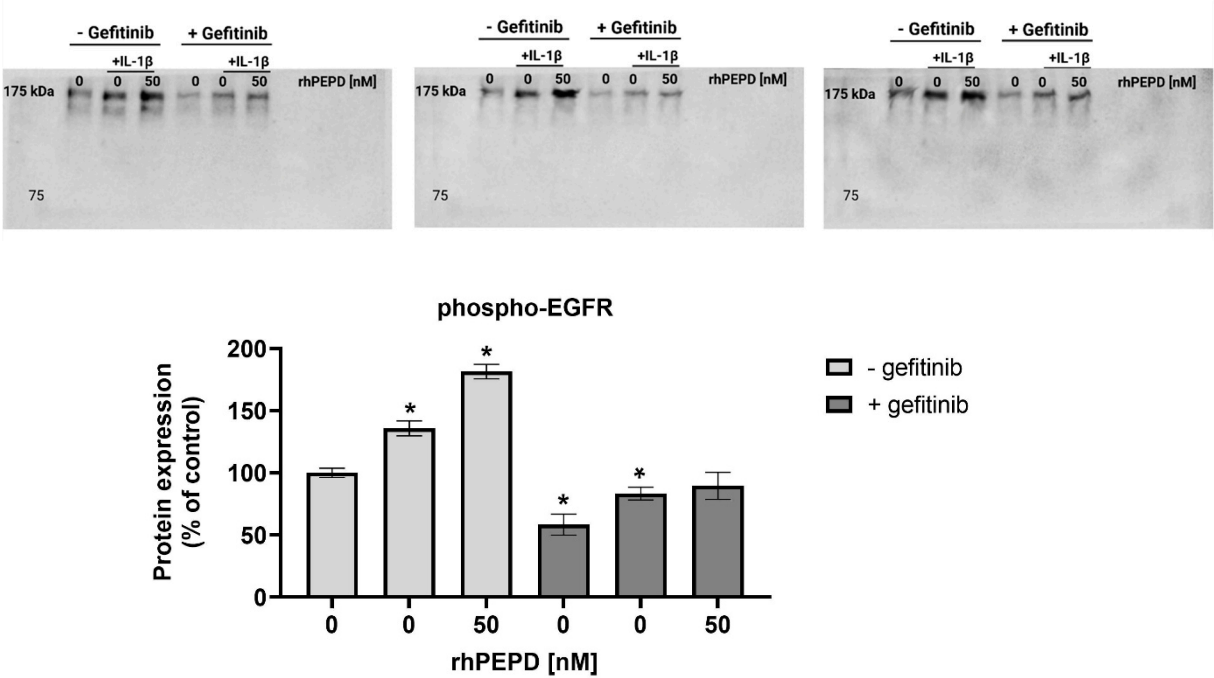

**Figure S11.** The phospho-EGFR expressions in lysates of rhPEPD-treated fibroblasts (rhPEPD, 50 nM) and pretreated with an inhibitor of EGFR (gefitinib, 45  $\mu$ M for 2 h) cultured for 40 min in presence or absence IL-1 $\beta$ . (10ng/ml). GAPDH expression was used as a loading control. The WB bands intensity of representative gels was quantified by densitometry and normalized to GAPDH. The densitometry values represent the mean (% of control)  $\pm$  SD of three experiments. Statistical significances were expressed as  $*P < 0.05$ ; vs. control cells (0 nM of PEPD, without IL-1 $\beta$ ).

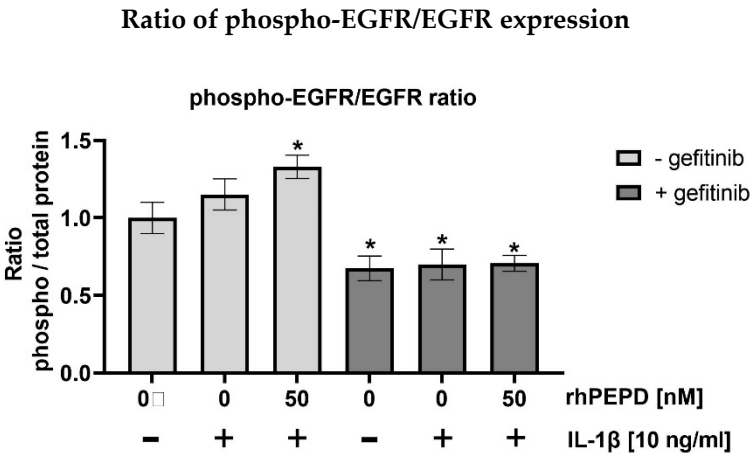



### 2.3. PI3K expression

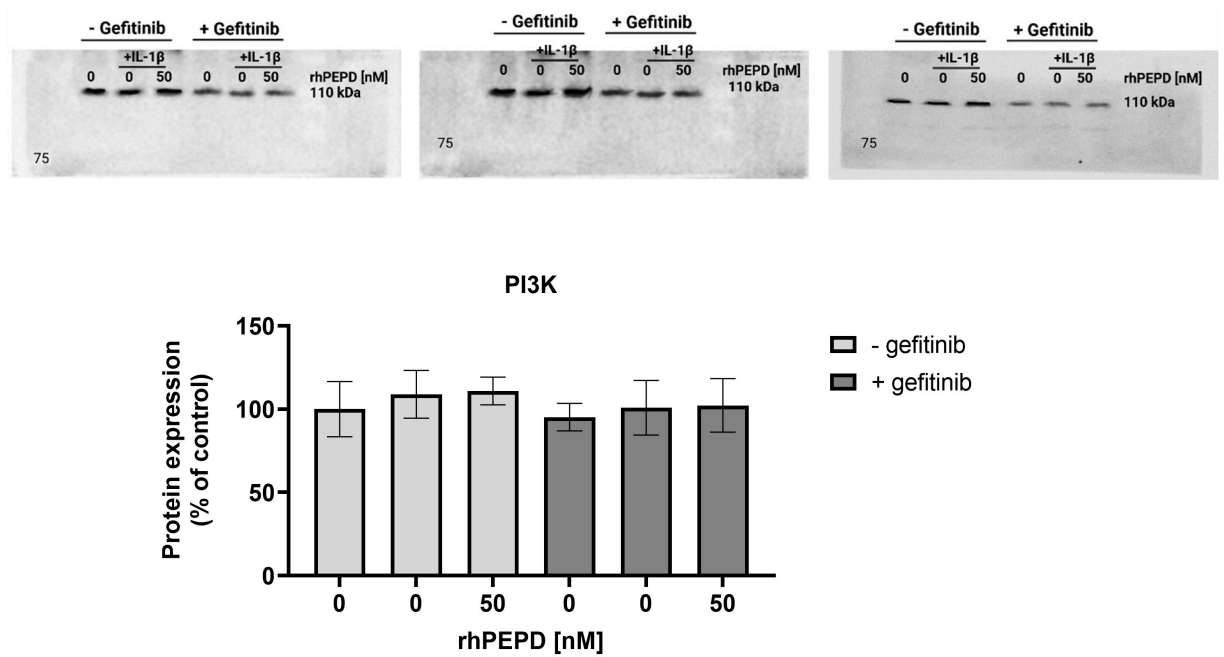

**Figure S12.** The PI3K expressions in lysates of rhPEPD-treated fibroblasts (rhPEPD, 50 nM) and pretreated with an inhibitor of EGFR (gefitinib, 45  $\mu$ M for 2 h) cultured for 24 h in presence or absence IL-1 $\beta$ . (10ng/ml). GAPDH expression was used as a loading control. The WB bands intensity of representative gels was quantified by densitometry and normalized to GAPDH. The densitometry values represent the mean (% of control)  $\pm$  SD of three experiments. Statistical significances were expressed as  $*P < 0.05$ ; vs. control cells (0 nM of PEPD, without IL-1 $\beta$ ).

### 2.4. Phospho-PI3K expression

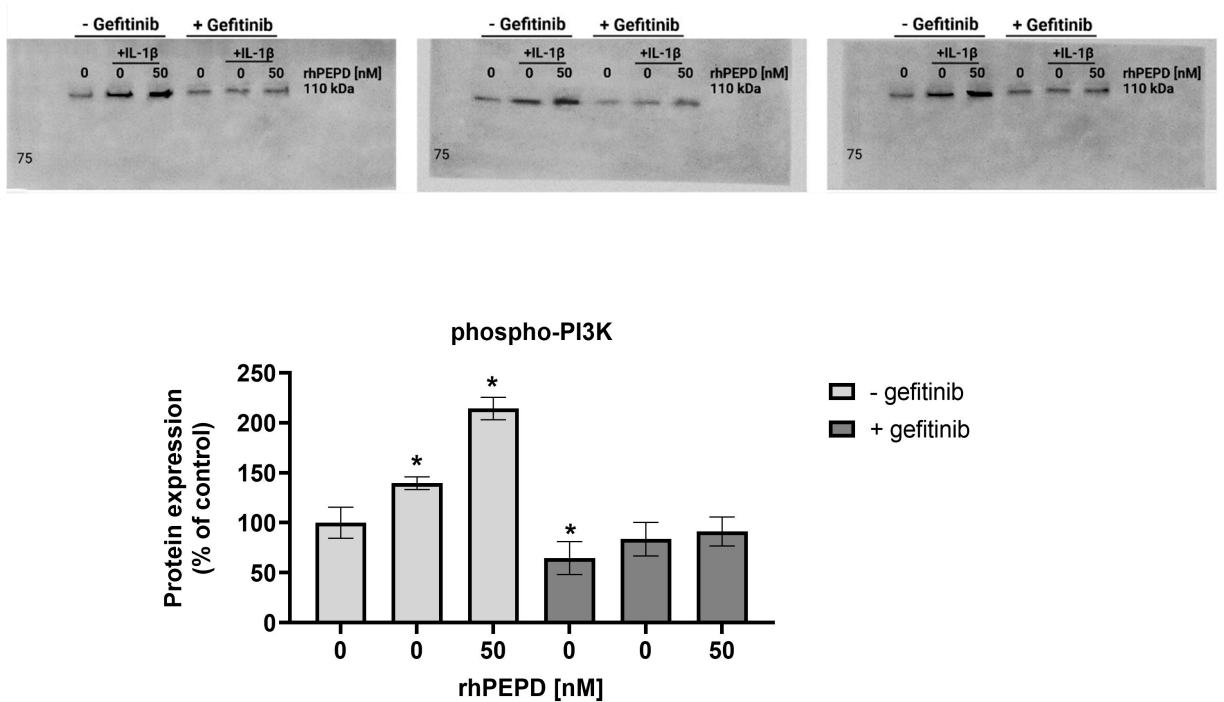

**Figure S13.** The phospho-PI3K expressions in lysates of rhPEPD-treated fibroblasts (rhPEPD, 50 nM) and pretreated with an inhibitor of EGFR (gefitinib, 45  $\mu$ M for 2 h) cultured for 40 min in presence or absence IL-1 $\beta$ . (10ng/ml). GAPDH expression was used as a loading control. The WB bands intensity of representative gels was quantified by densitometry and normalized to GAPDH. The densitometry values represent the mean (% of control)  $\pm$  SD of three experiments. Statistical significances were expressed as  $*P < 0.05$ ; vs. control cells (0 nM of PEPD, without IL-1 $\beta$ ).

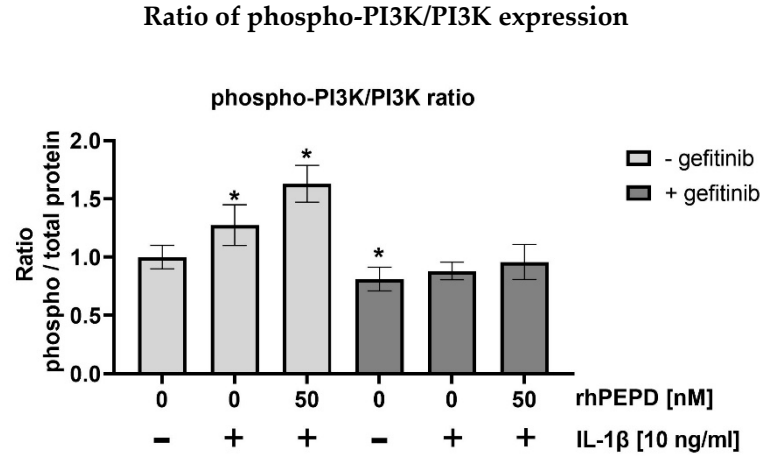

## 2.5. AKT expression

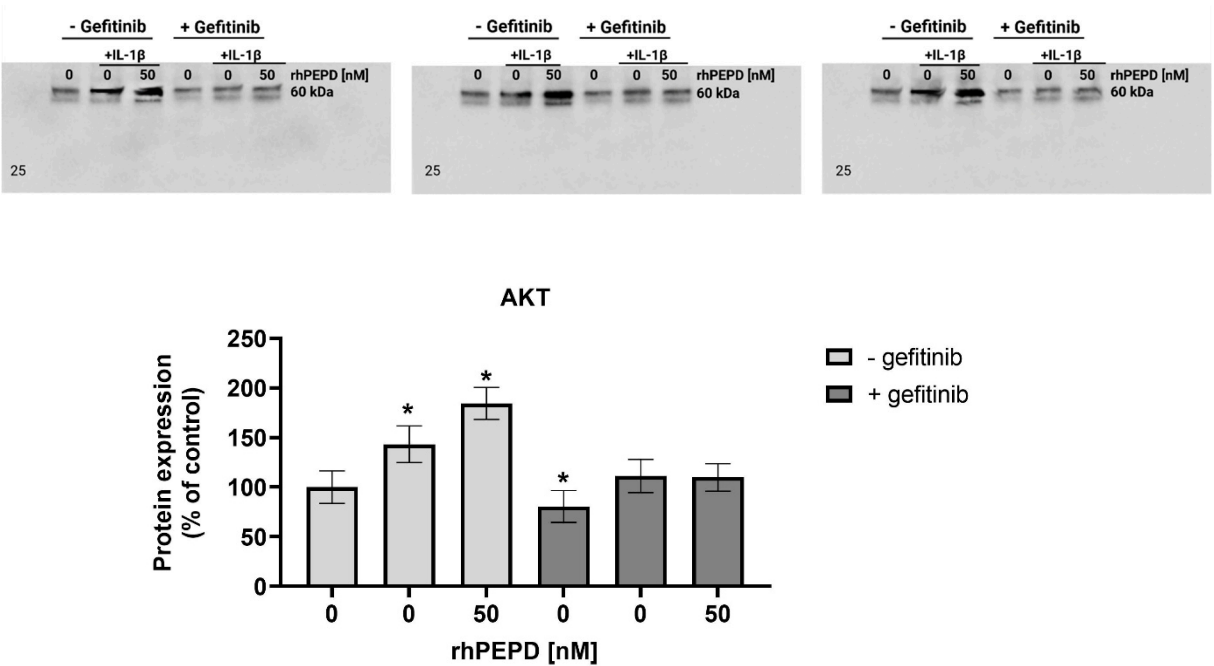

**Figure S14.** The AKT expressions in lysates of rhPEPD-treated fibroblasts (rhPEPD, 50 nM) and pretreated with an inhibitor of EGFR (gefitinib, 45  $\mu$ M for 2 h) cultured for 24 h in presence or absence IL-1 $\beta$ . (10ng/ml). GAPDH expression was used as a loading control. The WB bands intensity of representative gels was quantified by densitometry and normalized to GAPDH. The densitometry values represent the mean (% of control)  $\pm$  SD of three experiments. Statistical significances were expressed as  $*P < 0.05$ ; vs. control cells (0 nM of PEPD, without IL-1 $\beta$ ).

## 2.6. Phospho-AKT expression

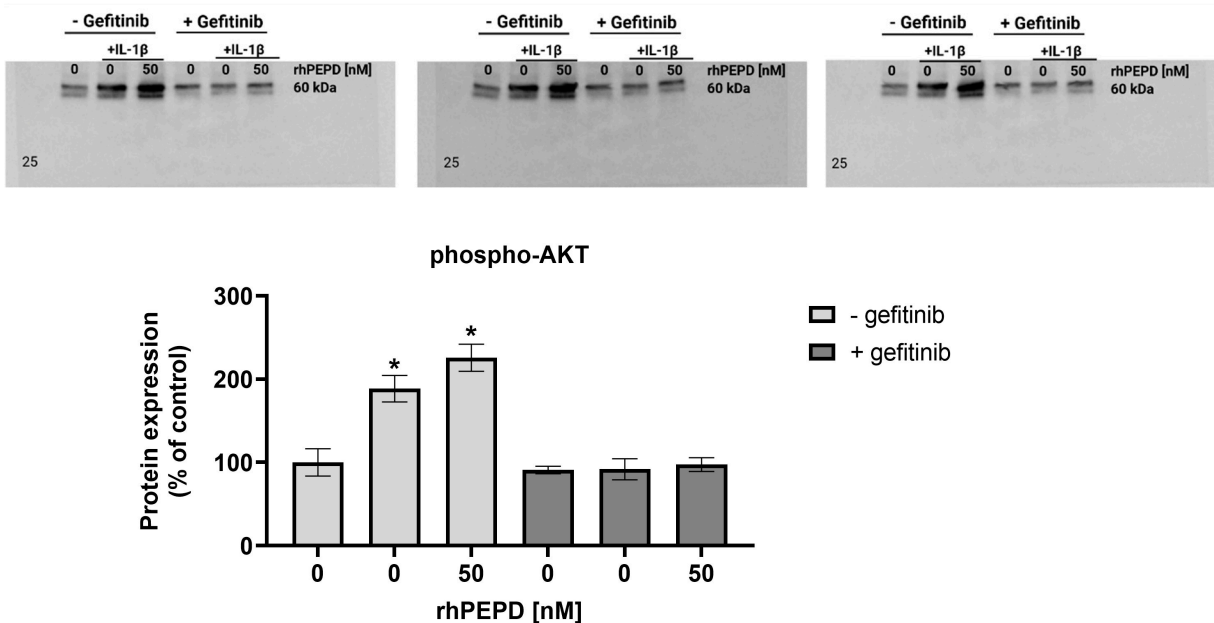

**Figure S15.** The phospho-AKT expressions in lysates of rhPEPD-treated fibroblasts (rhPEPD, 50 nM) and pretreated with an inhibitor of EGFR (gefitinib, 45  $\mu$ M for 2 h) cultured for 40 min in presence or absence IL-1 $\beta$ . (10ng/ml). GAPDH expression was used as a loading control. The WB bands intensity of representative gels was quantified by densitometry and normalized to GAPDH. The densitometry values represent the mean (% of control)  $\pm$  SD of three experiments. Statistical significances were expressed as \* $P$  < 0.05; vs. control cells (0 nM of PEPD, without IL-1 $\beta$ ).

## Ratio of phospho-AKT/AKT expression

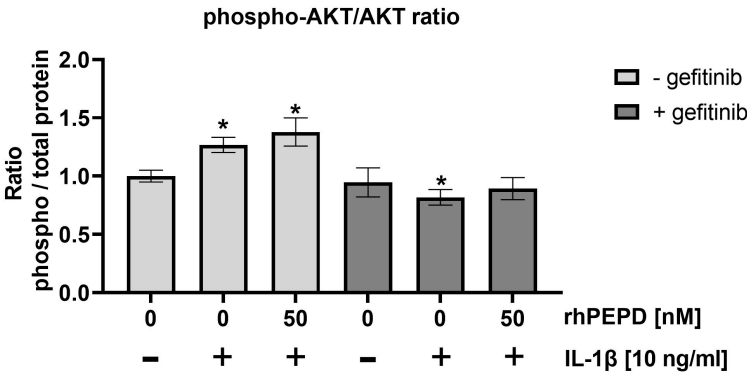

## 2.7. mTOR expression

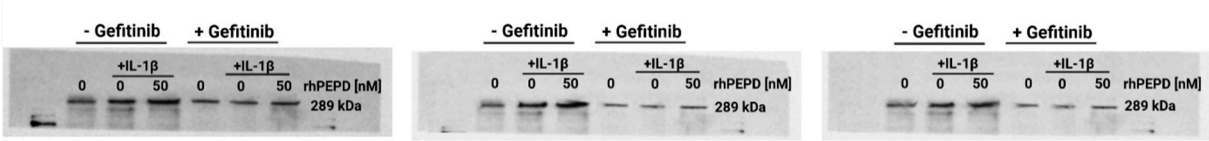

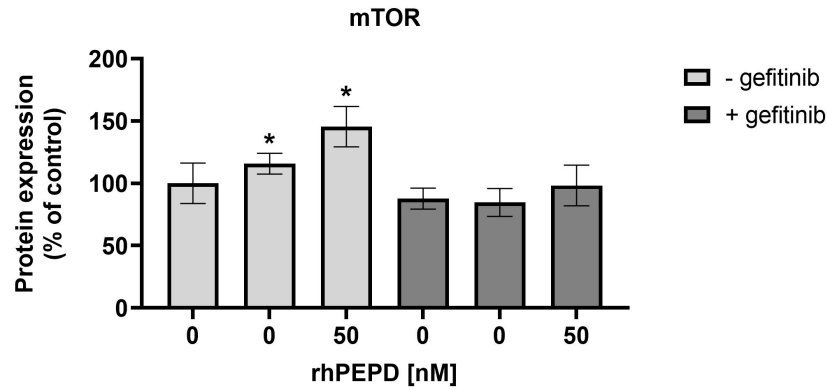

**Figure S16.** The mTOR expressions in lysates of rhPEPD-treated fibroblasts (rhPEPD, 50 nM) and pretreated with an inhibitor of EGFR (gefitinib, 45  $\mu$ M for 2 h) cultured for 24 h in presence or absence IL-1 $\beta$ . (10ng/ml). GAPDH expression was used as a loading control. The WB bands intensity of representative gels was quantified by densitometry and normalized to GAPDH. The densitometry values represent the mean (% of control)  $\pm$  SD of three experiments. Statistical significances were expressed as  $*P < 0.05$ ; vs. control cells (0 nM of PEPD, without IL-1 $\beta$ ).

## 2.8. Phospho-mTOR expression

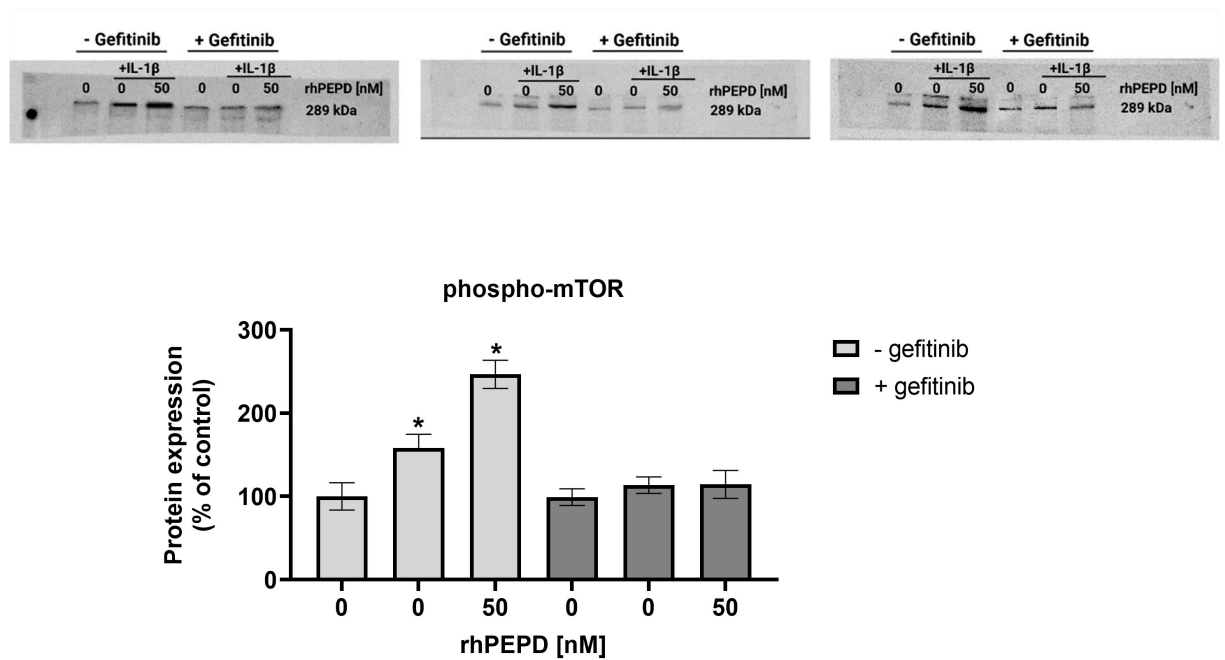

**Figure S17.** The phospho-mTOR expressions in lysates of rhPEPD-treated fibroblasts (rhPEPD, 50 nM) and pretreated with an inhibitor of EGFR (gefitinib, 45  $\mu$ M for 2 h) cultured for 40 min in presence or absence IL-1 $\beta$ . (10ng/ml). GAPDH expression was used as a loading control. The WB bands intensity of representative gels was quantified by densitometry and normalized to GAPDH. The densitometry values represent the mean (% of control)  $\pm$  SD of three experiments. Statistical significances were expressed as  $*P < 0.05$ ; vs. control cells (0 nM of PEPD, without IL-1 $\beta$ ).

## Ratio of phospho-mTOR/mTOR expression

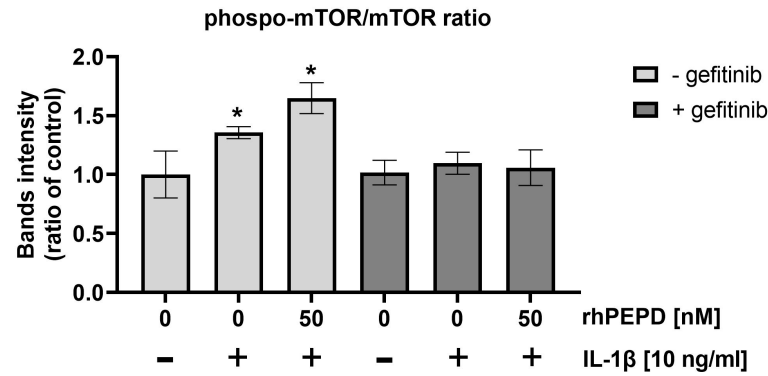

## 2.9. GAPDH expression

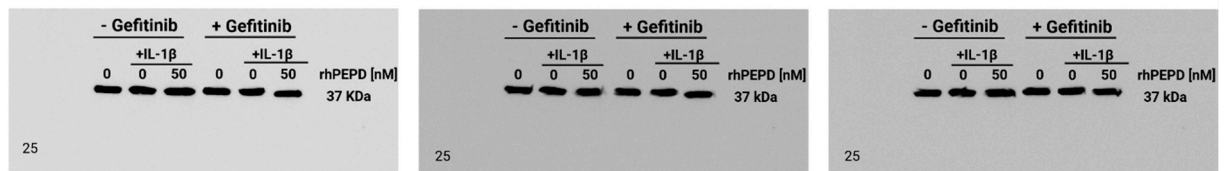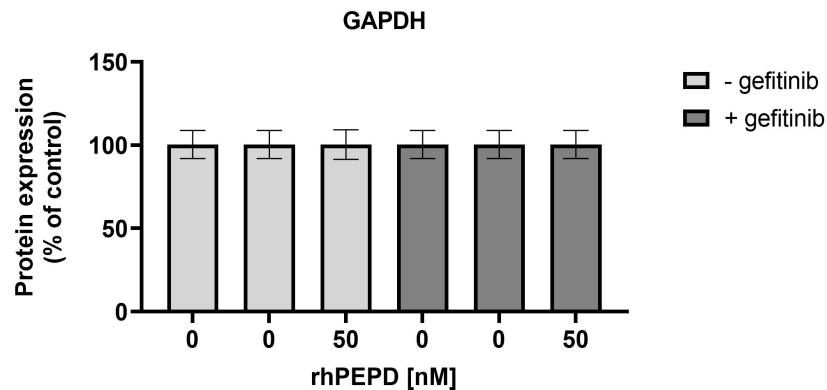

**Figure S18.** The GAPDH expressions in lysates of rhPEPD-treated fibroblasts (rhPEPD, 50 nM) and pretreated with an inhibitor of EGFR (gefitinib, 45  $\mu$ M for 2 h) cultured for 24 h in presence or absence IL-1 $\beta$ . (10ng/ml). GAPDH expression was used as a loading control. The WB bands intensity of representative gels was quantified by densitometry and normalized to GAPDH. The densitometry values represent the mean (% of control)  $\pm$  SD of three experiments. Statistical significances were expressed as  $*P < 0.05$ ; vs. control cells (0 nM of PEPD, without IL-1 $\beta$ ).

### 3. Representative blots from Western blotting analysis presented in Figure 4A.

#### 3.1. $\beta 1$ integrin expression

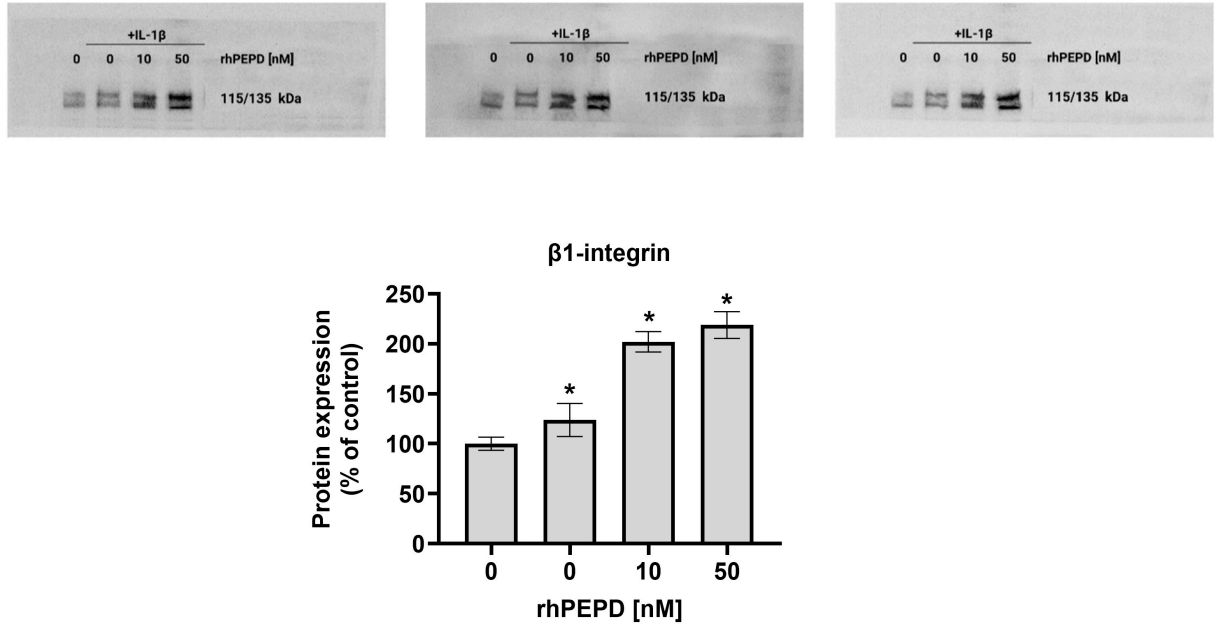

**Figure S19.** The  $\beta 1$  integrin expressions in rhPEPD-treated fibroblasts (rhPEPD, 10, 50 nM) for 24 h in presence or absence of IL-1 $\beta$  (10ng/ml). GAPDH expression was used as a loading control. The WB bands intensity of representative gels was quantified by densitometry and normalized to GAPDH. The densitometry values represent the mean (% of control)  $\pm$  SD of three experiments. Statistical significances were expressed as  $*P < 0.05$ ; vs. control cells (0 nM of PEPD, without IL-1 $\beta$ ).

#### 3.2. FAK expression

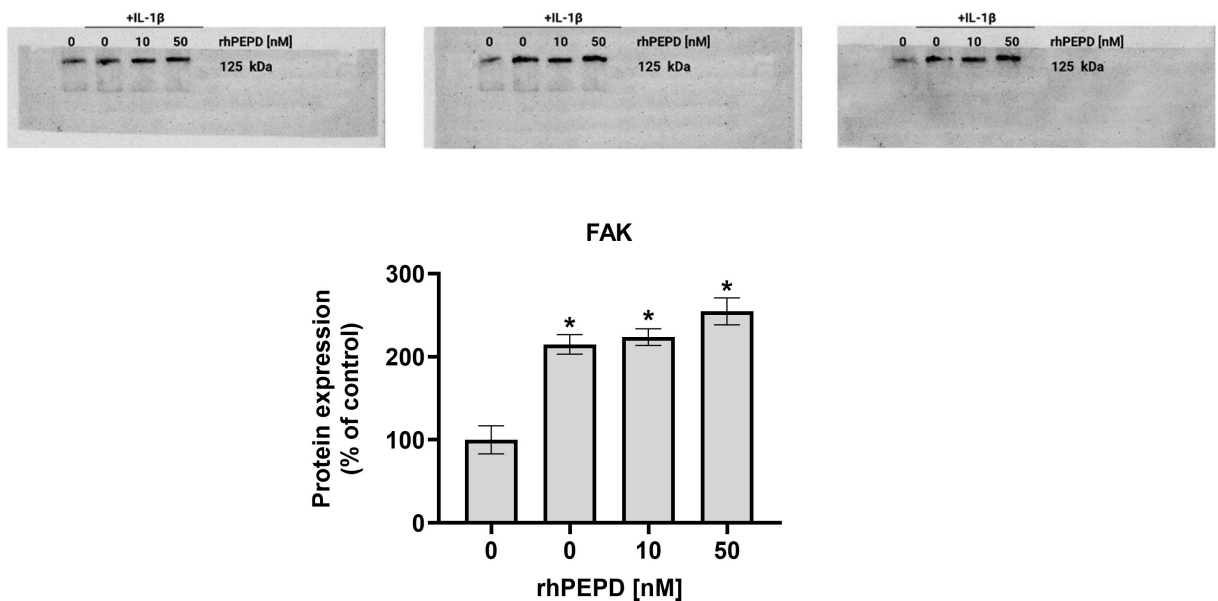



**Figure S20.** The FAK expressions in rhPEPD-treated fibroblasts (rhPEPD, 10, 50 nM) for 24 h in presence or absence of IL-1 $\beta$  (10ng/ml). GAPDH expression was used as a loading control. The WB bands intensity of representative gels was quantified by densitometry and normalized to GAPDH. The densitometry values represent the mean (% of control)  $\pm$  SD of three experiments. Statistical significances were expressed as  $*P < 0.05$ ; vs. control cells (0 nM of PEPD, without IL-1 $\beta$ ).

### 3.3. Phospho-FAK expression

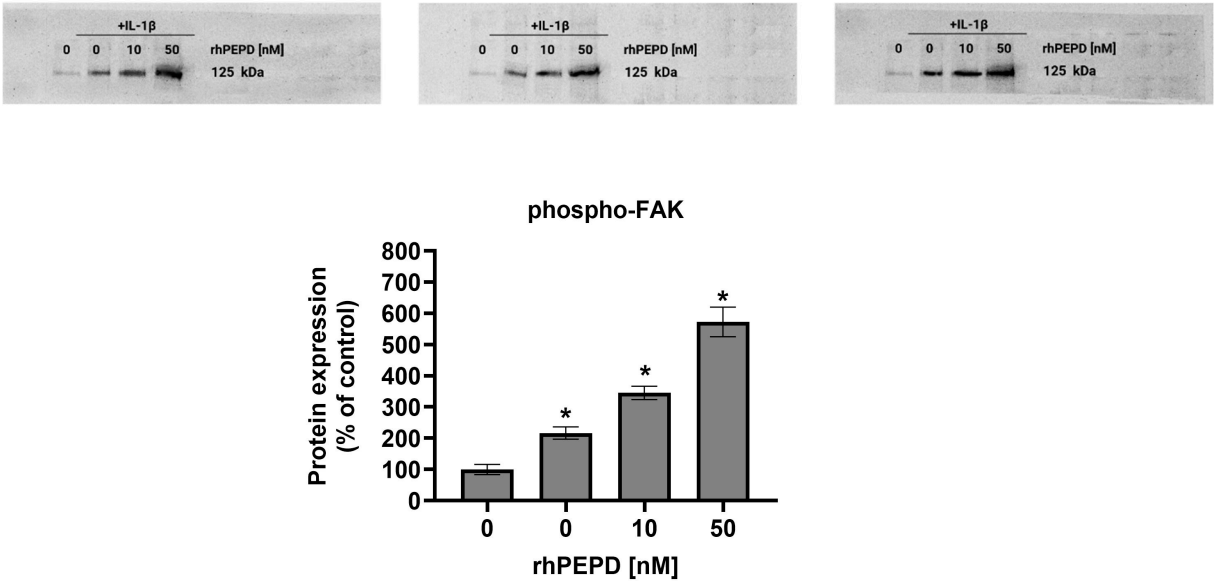

**Figure S21.** The phospho-FAK expressions in rhPEPD-treated fibroblasts (rhPEPD, 10, 50 nM) for 40 min in presence or absence of IL-1 $\beta$  (10ng/ml). GAPDH expression was used as a loading control. The WB bands intensity of representative gels was quantified by densitometry and normalized to GAPDH. The densitometry values represent the mean (% of control)  $\pm$  SD of three experiments. Statistical significances were expressed as  $*P < 0.05$ ; vs. control cells (0 nM of PEPD, without IL-1 $\beta$ ).

### 3.4. Grb2 expression

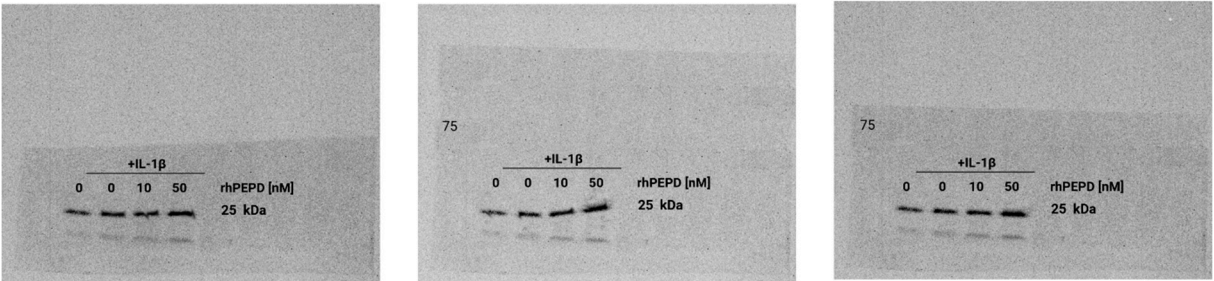

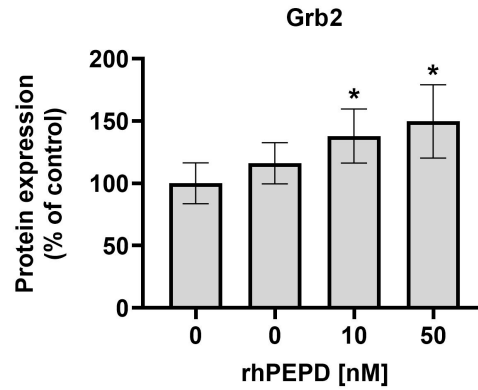

**Figure S22.** The Grb2 expressions in rhPEPD-treated fibroblasts (rhPEPD, 10, 50 nM) for 24 h in presence or absence of IL-1 $\beta$  (10ng/ml). GAPDH expression was used as a loading control. The WB bands intensity of representative gels was quantified by densitometry and normalized to GAPDH. The densitometry values represent the mean (% of control)  $\pm$  SD of three experiments. Statistical significances were expressed as \* $P$  < 0.05; vs. control cells (0 nM of PEPD, without IL-1 $\beta$ ).

### 3.5. ERK 1/2 expression

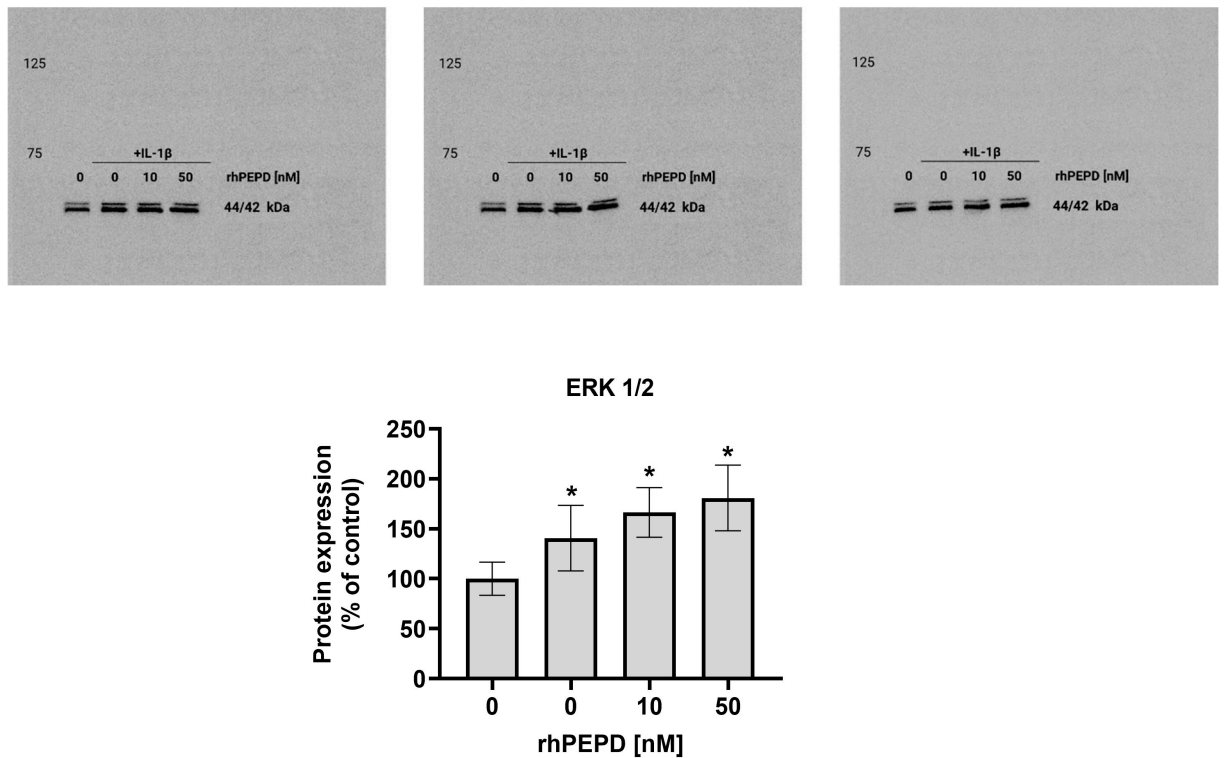

**Figure S23.** The ERK 1/2 expressions in rhPEPD-treated fibroblasts (rhPEPD, 10, 50 nM) for 40 min and 24 h in presence or absence of IL-1 $\beta$  (10ng/ml). GAPDH expression was used as a loading control. The WB bands intensity of representative gels was quantified by densitometry and normalized to GAPDH. The densitometry values represent the mean (% of control)  $\pm$  SD of three experiments. Statistical significances were expressed as \* $P$  < 0.05; vs. control cells (0 nM of PEPD, without IL-1 $\beta$ ).

### 3.6. Phospho-ERK 1/2 expression

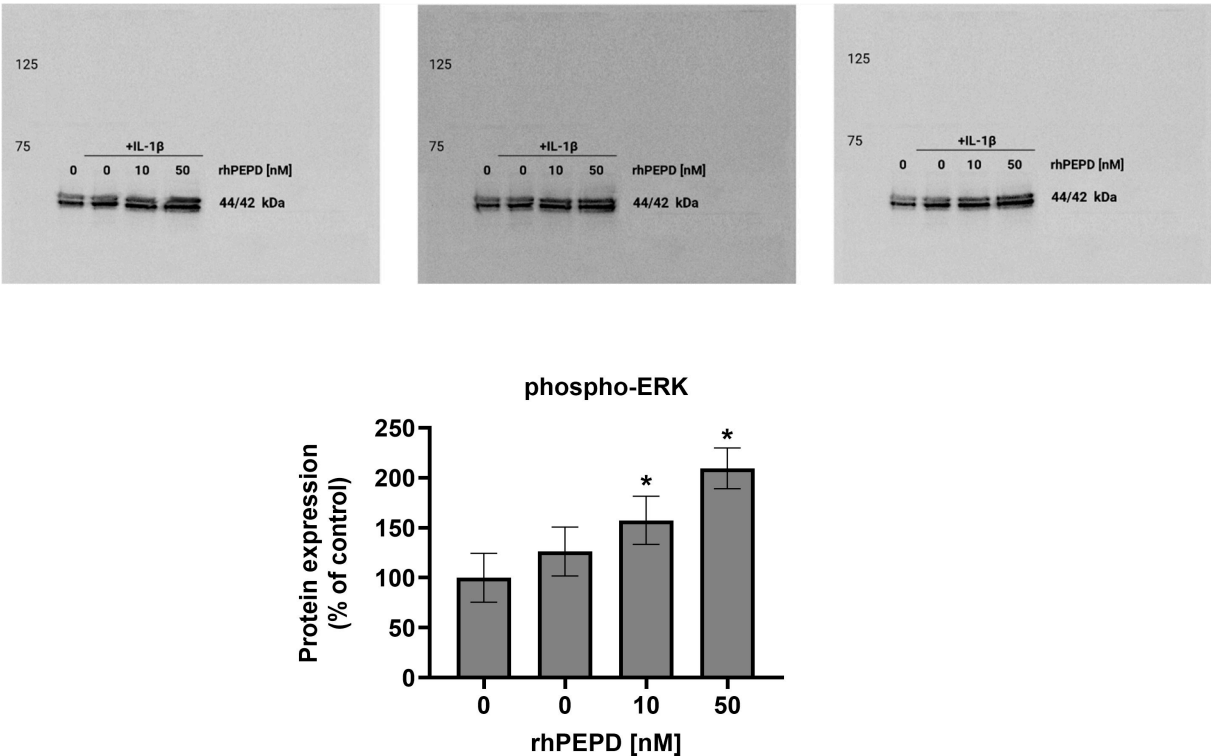

**Figure S24.** The phospho-ERK 1/2 expressions in rhPEPD-treated fibroblasts (rhPEPD, 10, 50 nM) for 40 min in presence or absence of IL-1 $\beta$  (10 ng/ml). GAPDH expression was used as a loading control. The WB bands intensity of representative gels was quantified by densitometry and normalized to GAPDH. The densitometry values represent the mean (% of control)  $\pm$  SD of three experiments. Statistical significances were expressed as \* $P$  < 0.05; vs. control cells (0 nM of PEPD, without IL-1 $\beta$ ).

## 4. Representative blots from Western blotting analysis presented in Figure 4B.

### 4.1. $\beta$ 1 integrin expression

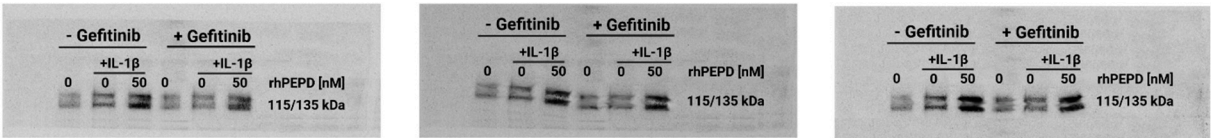

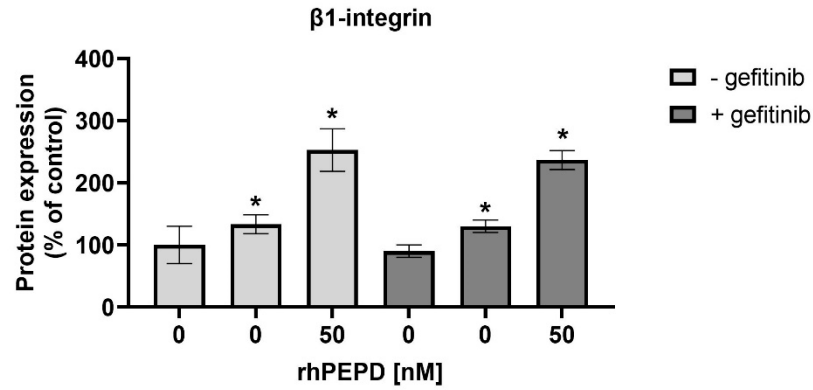

**Figure S25.** B1 integrin expressions in lysates of rhPEPD-treated fibroblasts (rhPEPD, 50 nM) and pretreated with an inhibitor of EGFR (gefitinib, 45  $\mu$ M for 2 h) cultured for 24 h in presence or absence IL-1 $\beta$ . (10ng/ml). GAPDH expression was used as a loading control. The WB bands intensity of representative gels was quantified by densitometry and normalized to GAPDH. The densitometry values represent the mean (% of control)  $\pm$  SD of three experiments. Statistical significances were expressed as \* $P$  < 0.05; vs. control cells (0 nM of PEPD, without IL-1 $\beta$ ).

#### 4.2. Phospho-FAK expression

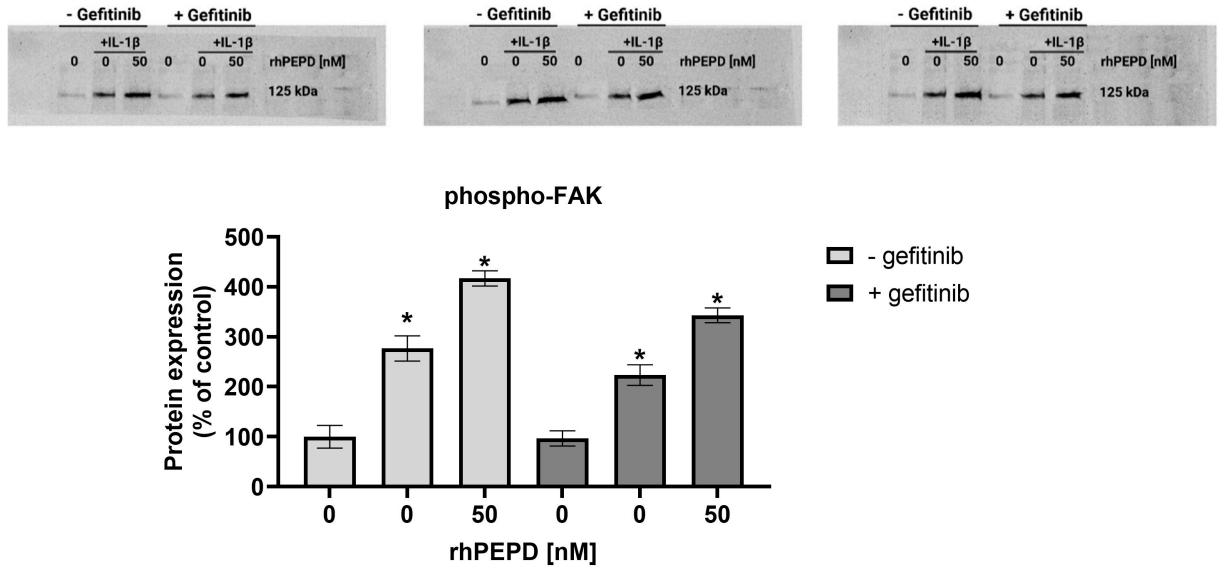

**Figure S26.** Phospho-FAK expressions in lysates of rhPEPD-treated fibroblasts (rhPEPD, 50 nM) and pretreated with an inhibitor of EGFR (gefitinib, 45  $\mu$ M for 2 h) cultured for 40 min in presence or absence IL-1 $\beta$ . (10ng/ml). GAPDH expression was used as a loading control. The WB bands intensity of representative gels was quantified by densitometry and normalized to GAPDH. The densitometry values represent the mean (% of control)  $\pm$  SD of three experiments. Statistical significances were expressed as \* $P$  < 0.05; vs. control cells (0 nM of PEPD, without IL-1 $\beta$ ).

#### 4.3. Grb2 expression

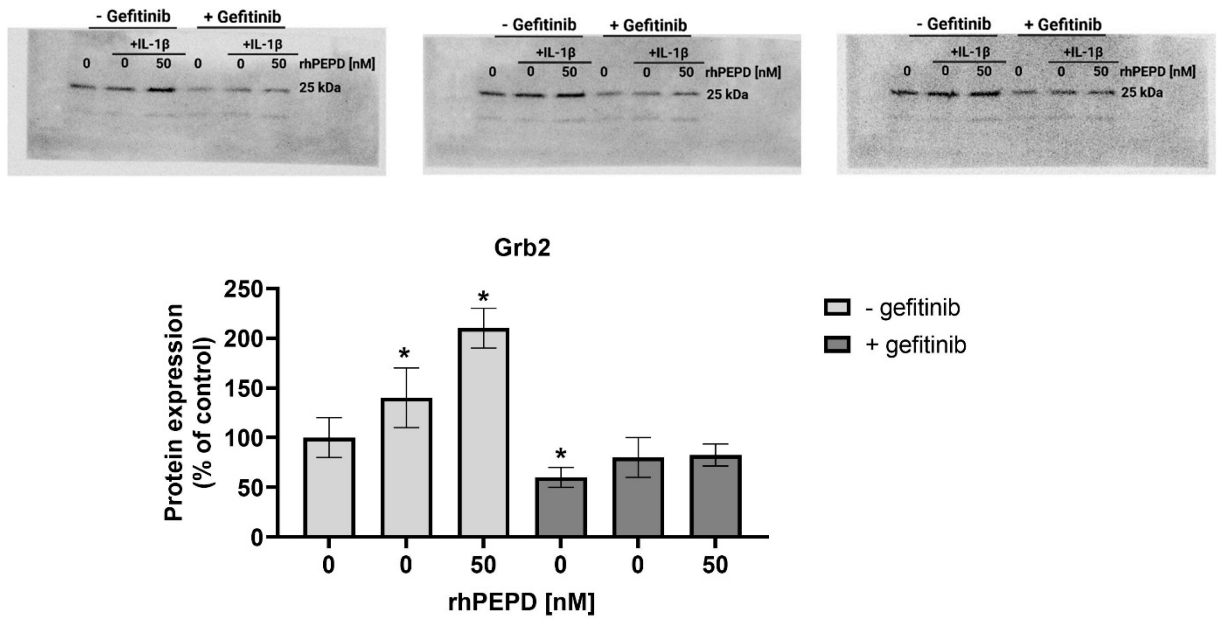

**Figure S27.** Grb2 expressions in lysates of rhPEPD-treated fibroblasts (rhPEPD, 50 nM) and pretreated with an inhibitor of EGFR (gefitinib, 45  $\mu$ M for 2 h) cultured for 24 h in presence or absence IL-1 $\beta$  (10ng/ml). GAPDH expression was used as a loading control. The WB bands intensity of representative gels was quantified by densitometry and normalized to GAPDH. The densitometry values represent the mean (% of control)  $\pm$  SD of three experiments. Statistical significances were expressed as \* $P$  < 0.05; vs. control cells (0 nM of PEPD, without IL-1 $\beta$ ).

#### 4.4. ERK 1/2 expression

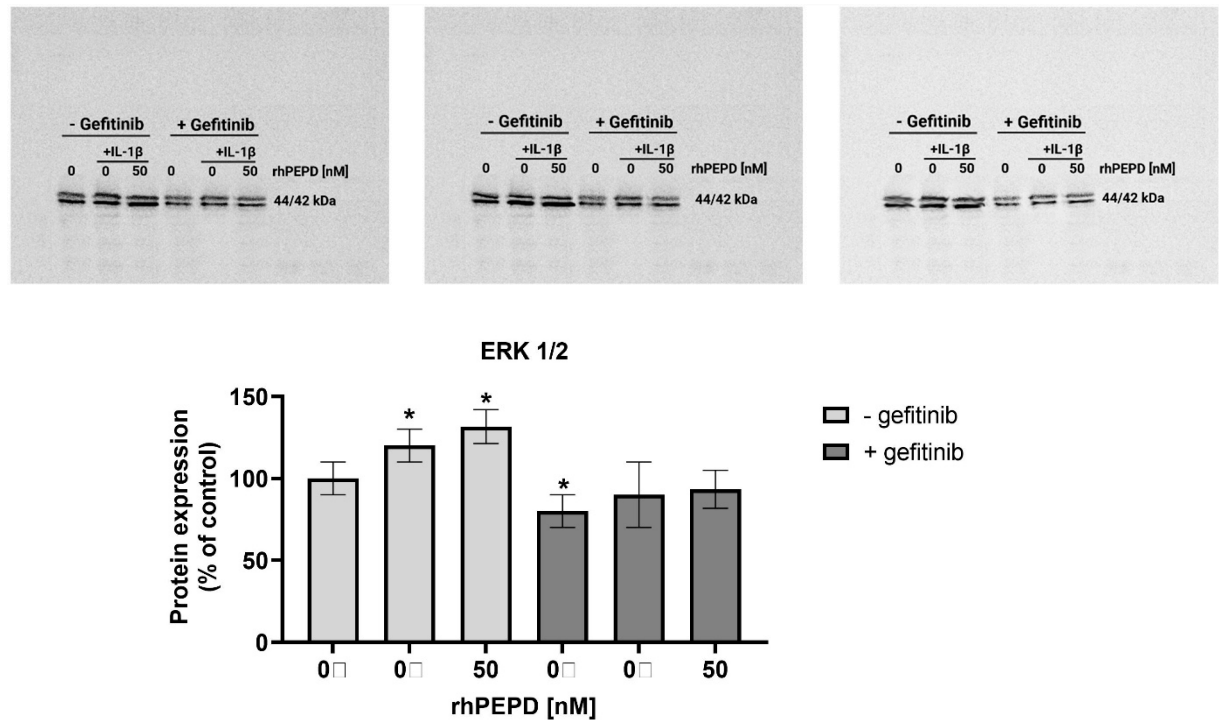

**Figure S28.** Erk1/2 expressions in lysates of rhPEPD-treated fibroblasts (rhPEPD, 50 nM) and pretreated with an inhibitor of EGFR (gefitinib, 45  $\mu$ M for 2 h) cultured for 24 h in presence or absence IL-1 $\beta$ . (10ng/ml). GAPDH expression was used as a loading control. The WB bands intensity of representative gels was quantified by densitometry and normalized to GAPDH. The densitometry values represent the mean (% of control)  $\pm$  SD of three experiments. Statistical significances were expressed as  $*P < 0.05$ ; vs. control cells (0 nM of PEPD, without IL-1 $\beta$ ).

#### 4.5. Phospho-ERK 1/2 expression

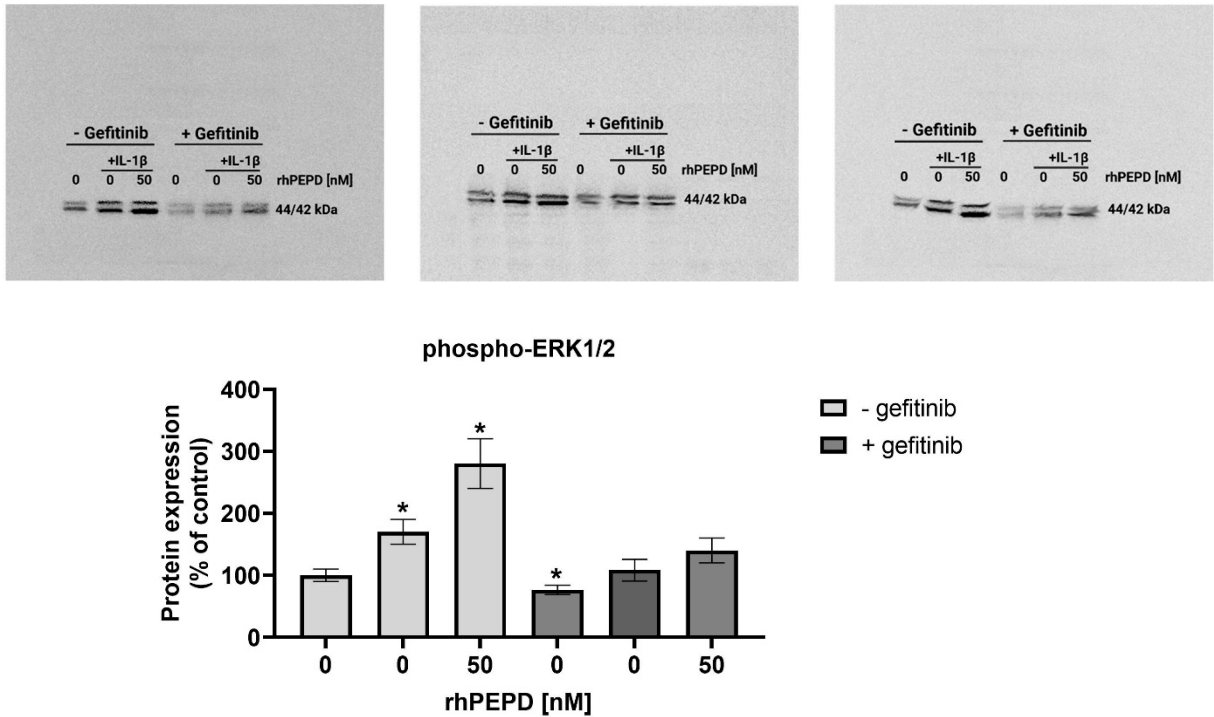

**Figure S29.** Phospho-Erk1/2 expressions in lysates of rhPEPD-treated fibroblasts (rhPEPD, 50 nM) and pretreated with an inhibitor of EGFR (gefitinib, 45  $\mu$ M for 2 h) cultured for 40 min in presence or absence IL-1 $\beta$ . (10ng/ml). GAPDH expression was used as a loading control. The WB bands intensity of representative gels was quantified by densitometry and normalized to GAPDH. The densitometry values represent the mean (% of control)  $\pm$  SD of three experiments. Statistical significances were expressed as  $*P < 0.05$ ; vs. control cells (0 nM of PEPD, without IL-1 $\beta$ ).



## 5. CellTiter-Blue Cell Viability Assay

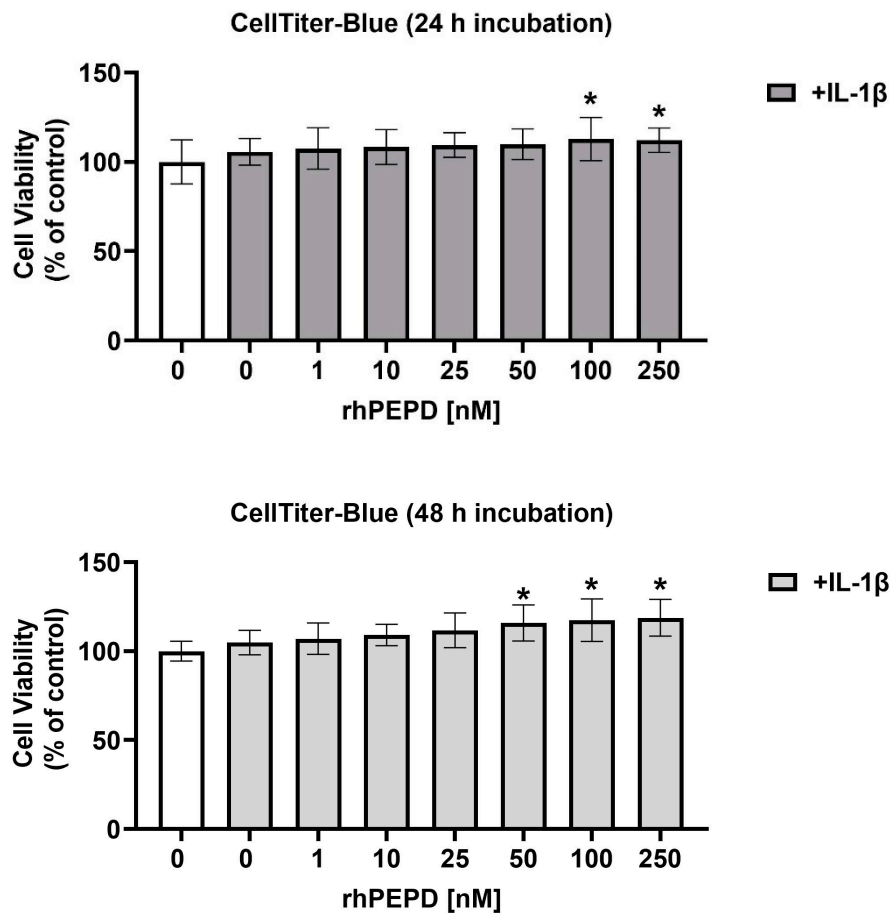

**Figure S30.** Cell viability of fibroblasts was measured using Cell Titer Blue assay as described in the manufacturer's protocol (Promega, Madison, WI, United States). Cells, seeded at  $5 \times 10^3$  cells/well in a 96-well plate, were submitted to rhPEPD treatment at concentrations of 1–250 nM and IL-1 $\beta$  (10 ng/ml)-for 24 h and 48 h. Briefly, cells were incubated with a resazurin-containing solution at 37°C for 2 h. Absorbance was read on TECAN Infinite® M200 PRO (Tecan Group Ltd., Männedorf, Switzerland) at 570 and 600 nm as a reference wavelength. The results were presented as a percent of the control value. The mean values  $\pm$  S.D. of three experiments done in duplicates are presented. The statistical significance was calculated vs. control (0 nM of rhPEPD, without IL-1 $\beta$ ) and the results were considered significant at  $*P < 0.05$ .

## 6. The influence of Gefitinib on the viability of fibroblasts

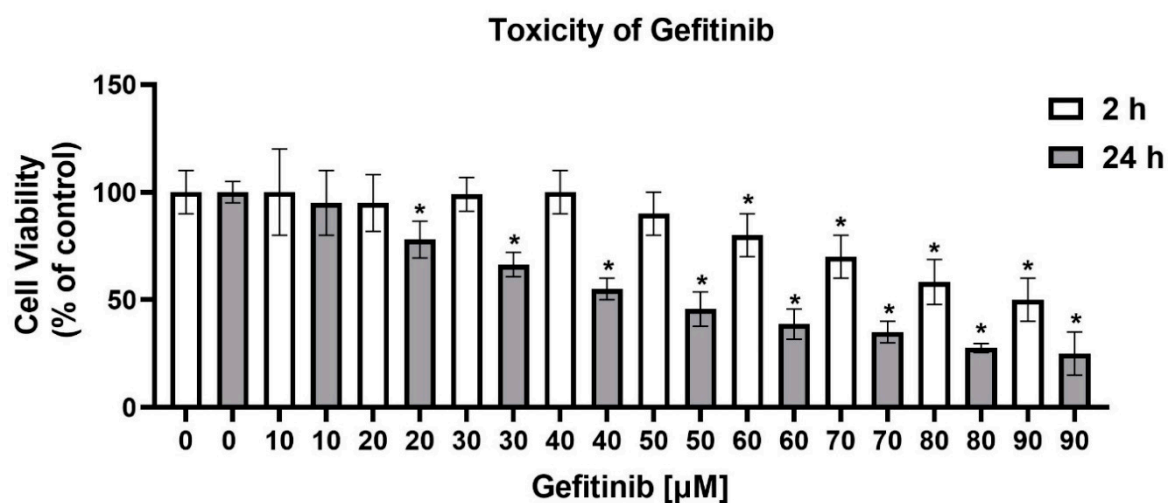

**Figure S31.** The influence of gefitinib on the viability of fibroblasts was measured using MTT test. Cells were treated of Gefitinib at concentrations of 0-90  $\mu\text{M}$  for 2 h and 24 h. The results were presented as a percent of the control value. The mean values  $\pm$  S.D. of three experiments done in duplicates are presented. The statistical significance was calculated vs. control (0  $\mu\text{M}$  Gefitinib) and the results were considered significant at  $*P < 0.05$ .
